# Supplementary material for: Lightweight target detection for large-field ddPCR images based on improved YOLOv5
Source: Royal Society of Chemistry journal article supplement (doi:10.1039/d5dd00006h), 2025-01-01
Supplement: d5dd00006h2.pdf [file d5dd00006h2.pdf]

## **Supporting Information**

### **Lightweight target detection for large-field ddPCR images based on improved YOLOv5**

Xingyu Jin <sup>a</sup>, Jing Yang <sup>b</sup>, Jijun Feng <sup>a,\*</sup>, Xiaorui Jiang <sup>c</sup>, Zhenqing Li <sup>a,\*</sup>, Jinrong Shen <sup>d</sup>, Zhiheng Yu <sup>a</sup>, Cunliang Yang <sup>a</sup>, Fengli Huang <sup>e</sup>, Dunlu Peng <sup>a</sup> and Yoshinori Yamaguchi <sup>f</sup>

<sup>a</sup> Shanghai Key Laboratory of Modern Optical System, Engineering Research Center of Optical Instrument and System (Ministry of Education), School of Optical-Electrical and Computer Engineering, University of Shanghai for Science and Technology, Shanghai 200093, China.

<sup>b</sup> Faculty of Engineering, Anhui Sanlian University, Hefei, 230000, China.

<sup>c</sup> National Key Laboratory of Electromagnetic Space Security, Tianjin 300308, China.

<sup>d</sup> State Key Laboratory of ASIC and System, Fudan University, Shanghai 200433, China

<sup>e</sup> The Key Laboratory of Medical Electronics and Digital Health of Zhejiang Province, Jiaxing University, Jiaxing 314001, China.

<sup>f</sup> Comprehensive Research Organization, Waseda University, Tokyo 162-0041, Japan.

Corresponding author: Jijun Feng, [fijun@usst.edu.cn](mailto:fijun@usst.edu.cn), Zhenqing Li, [zhenqingli@163.com](mailto:zhenqingli@163.com)

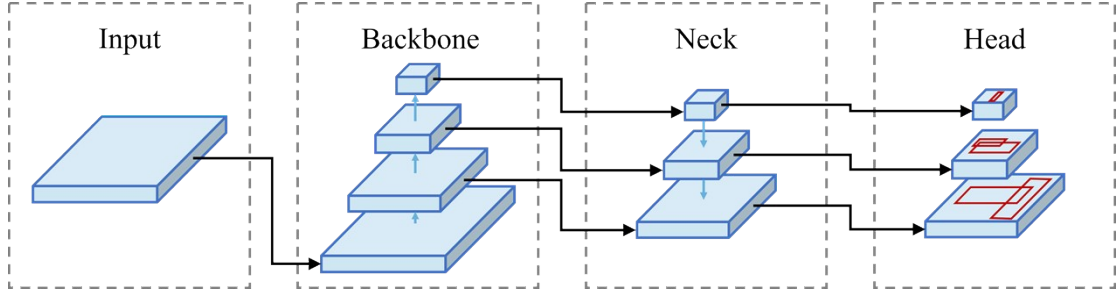

**Fig. S1. YOLOv5 network detection workflow.** The backbone network captures image features, which are subsequently refined and integrated by the neck network. The head network outputs the final target predictions, detailing both categories and locations.

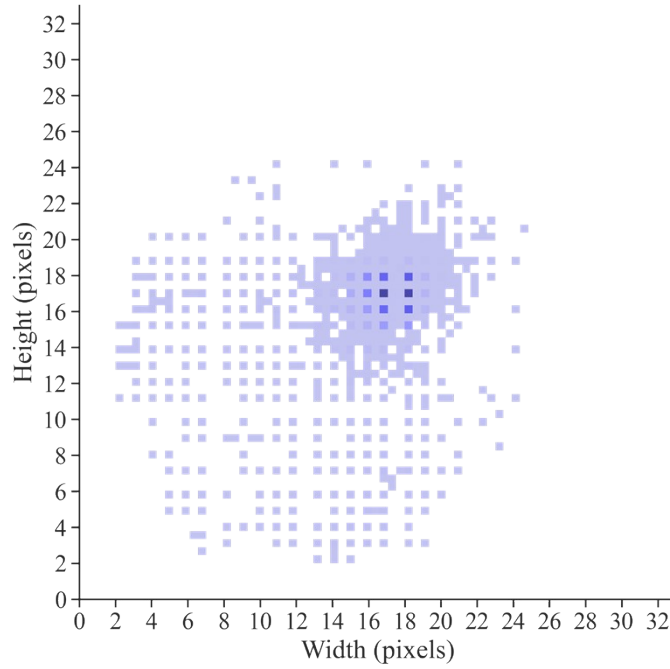

**Fig. S2. Size distribution of annotated boxes for targets.** The dimensions of all microchambers are confined to a  $32 \times 32$  pixel, covering the detection ranges of P2, P3, and P4. The majority are concentrated within the region surrounding  $14 \times 14$  to  $20 \times 20$  pixels. Since the cropped droplets in the sub-images were considered during annotation, the distribution of annotated detection boxes is wider in size.

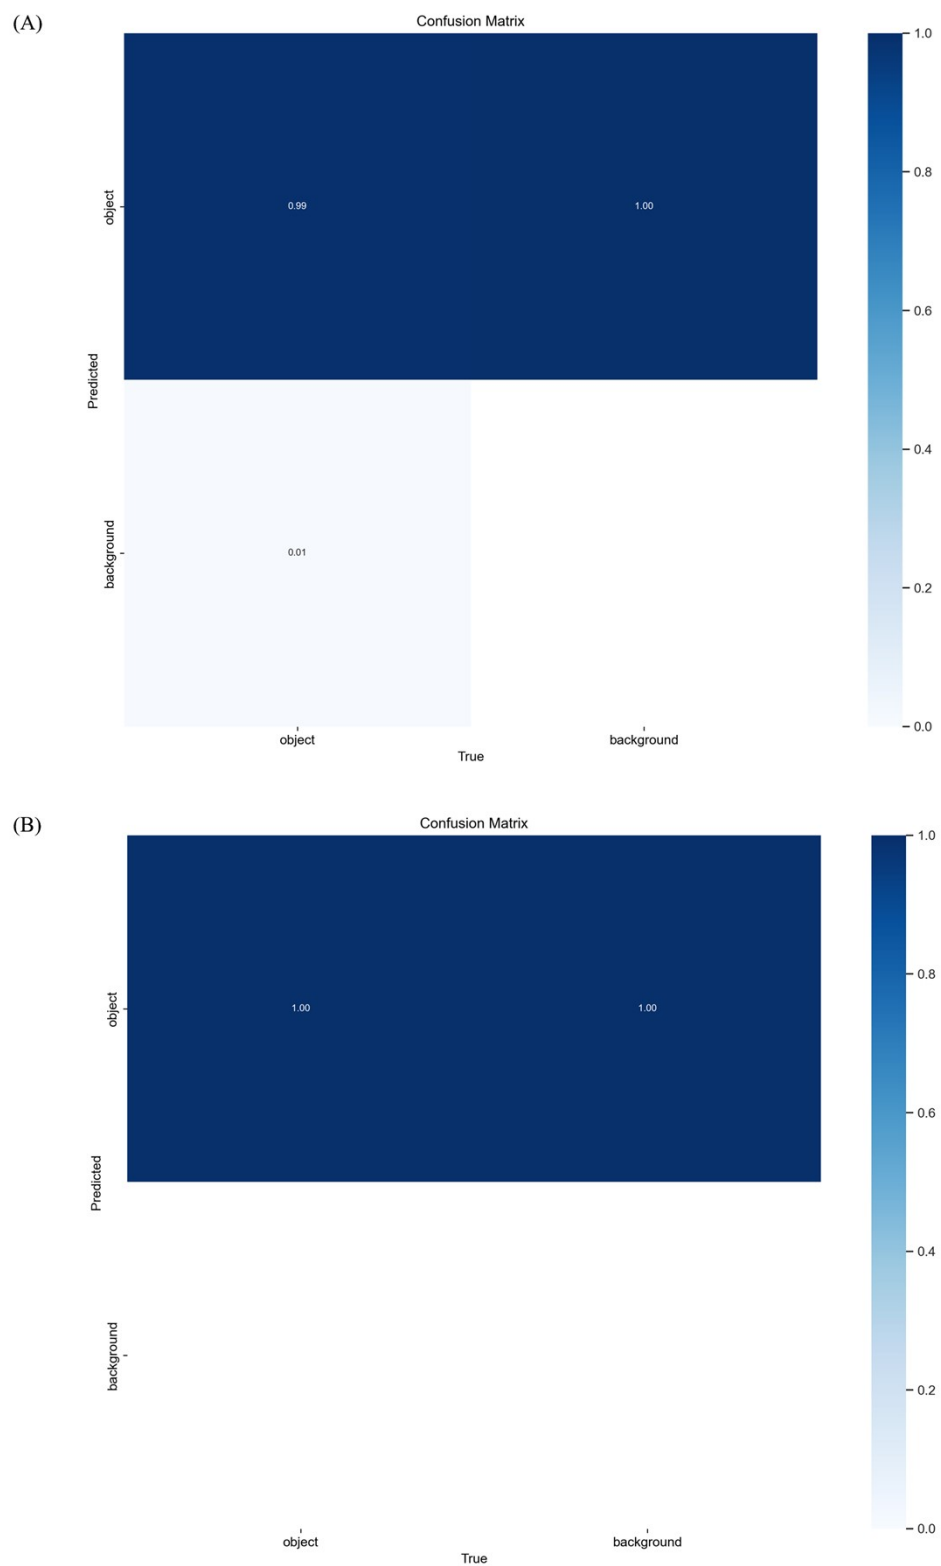

**Fig. S3. Confusion Matrices. (A) Results of the original YOLOv5s model. (B) Training results of the final optimized model.**

**Table S1. Hardware configuration and operating environment.**

| Device           | Details                 |
|------------------|-------------------------|
| CPU              | Intel Core i7-10750H    |
| GPU              | NVIDIA GeForce RTX 3060 |
| Memory           | 16 G                    |
| Graphics Memory  | 6 G                     |
| SSD              | 512 G                   |
| Operating System | Windows 11              |
| Python           | 3.9.7                   |
| PyTorch          | 1.13.0                  |
| CUDA             | 11.7                    |
| CUDNN            | 8.8.1                   |

**Table S2. Comparison of different detection scales.**

| P<br>2 | P<br>3 | P<br>4 | P<br>5 | P         | R         | mAP(0.5:0.95<br>) | Parameter<br>s | Size(MB<br>) | FLOPs(G<br>) |
|--------|--------|--------|--------|-----------|-----------|-------------------|----------------|--------------|--------------|
|        | ✓      | ✓      | ✓      | 99.5<br>% | 99.3<br>% | 77.9%             | 7012822        | 14.4         | 15.8         |
|        | ✓      | ✓      |        | 99.5<br>% | 99.3<br>% | 77.9%             | 1558340        | 3.4          | 10.1         |
| ✓      | ✓      | ✓      |        | 99.2<br>% | 99.5<br>% | 78.3%             | 1701526        | 4.3          | 12.9         |

**Table S3. Comparison of different feature fusion methods.**

| Method | P     | R     | mAP(0.5:0.95) | Parameters | Size(MB) | FLOPs(G) |
|--------|-------|-------|---------------|------------|----------|----------|
| PANet  | 99.2% | 99.5% | 78.3%         | 1701526    | 4.3      | 12.9     |
| FPN    | 99.5% | 99.4% | 77.8%         | 1442902    | 3.8      | 11.6     |
| BiFPN  | 99.3% | 99.4% | 78.5%         | 1717910    | 4.4      | 13.1     |

**Table S4. Comparison of different module improvement experiments. "B" and "N" represent the backbone and neck networks, respectively, while "S" indicates the insertion of attention mechanism.**

| B | N | S | P     | R     | mAP(0.5:0.95) | Parameters | Size(MB) | FLOPs(G) |
|---|---|---|-------|-------|---------------|------------|----------|----------|
| ✓ |   |   | 99.5% | 99.3% | 77.9%         | 1292030    | 3.5      | 9.8      |
|   | ✓ |   | 99.2% | 99.6% | 78.5%         | 854492     | 3.7      | 10.6     |
| ✓ | ✓ |   | 99.5% | 99.3% | 78.2%         | 946246     | 2.9      | 7.3      |
|   |   | ✓ | 99.4% | 99.7% | 78.7%         | 1718358    | 4.4      | 13.1     |
| ✓ |   | ✓ | 99.4% | 99.4% | 78%           | 1292030    | 3.6      | 9.8      |
|   | ✓ | ✓ | 99.5% | 99.5% | 78.7%         | 1372574    | 3.7      | 10.6     |
| ✓ | ✓ | ✓ | 99.3% | 99.4% | 78.6%         | 946246     | 2.9      | 7.3      |

**Table S5. Results of ablation experiment. Scheme A: Original model without modifications. Scheme B: Improved with scales P2, P3, P4. Scheme C: Improved with BiFPN. Scheme D: Improved with GhostConv, C3Ghost, and SimAM. Scheme E: Improved with network pruning.**

| Scheme | P     | R     | mAP(0.5:0.95) | Parameters | Size(MB) | FLOPs(G) |
|--------|-------|-------|---------------|------------|----------|----------|
| A      | 99.5% | 99.3% | 77.9%         | 7012822    | 14.4     | 15.8     |
| B      | 99.2% | 99.5% | 78.3%         | 1701526    | 4.3      | 12.9     |
| C      | 99.3% | 99.4% | 78.5%         | 1717910    | 4.4      | 13.1     |
| D      | 99.3% | 99.4% | 78.6%         | 946246     | 2.9      | 7.3      |
| E      | 99.5% | 99.5% | 78.1%         | 262047     | 1.5      | 2.6      |

**Table S6. Comparison of mainstream single-stage object detection algorithms.**

| Model                | P     | R     | mAP(0.5:0.95) | Parameters | Size(MB) | FLOPs(G) |
|----------------------|-------|-------|---------------|------------|----------|----------|
| SSD                  | 80.8% | 44.6% | 41.9%         | 26649772   | 90.6     | 35       |
| YOLOv3-tiny          | 99.7% | 98.9% | 74.1%         | 8666692    | 17.4     | 12.9     |
| YOLOv5s-ShuffleNetv2 | 99.5% | 99.1% | 76.5%         | 842358     | 2.0      | 1.8      |
| YOLOv5s-MobileNetv3  | 99.4% | 98.4% | 76.3%         | 1374732    | 3.1      | 2.3      |
| YOLOv5n              | 99.4% | 99.3% | 77.3%         | 1760518    | 3.9      | 4.1      |
| YOLOv5s              | 99.5% | 99.3% | 77.9%         | 7012822    | 14.4     | 15.8     |
| Ours                 | 99.5% | 99.5% | 78.1%         | 262047     | 1.5      | 2.6      |
